# Supplementary material for: Assessing the Consumer Food Environment in Restaurants by Neighbourhood Distress Level across Saskatoon, Saskatchewan
Source: Atypon-hosted journal article supplement (doi:10.3148/cjdpr-2015-031), 2015-10-09
Supplement: cjdpr-2015-031suppl.pdf [file cjdpr-2015-031suppl.pdf]

## Supplementary Figure 1

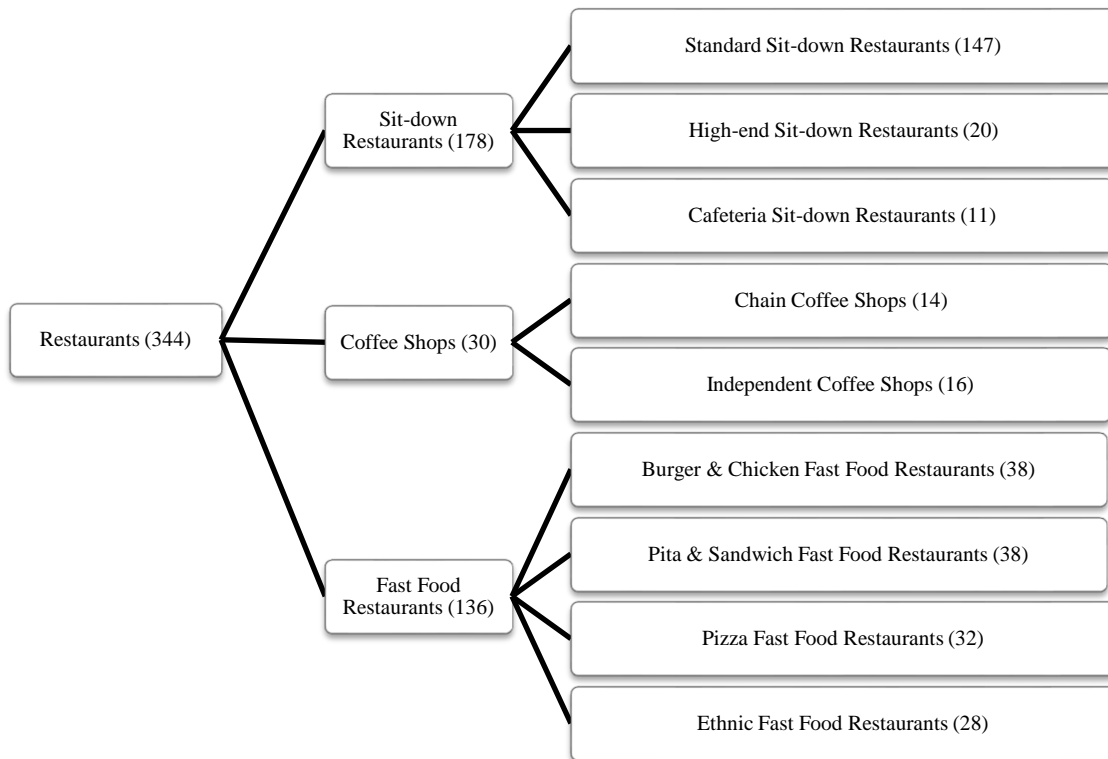

Restaurant sub-categories\* (numbers) in residential neighbourhoods, Saskatoon

---

\* Sit-down restaurants include restaurants that offer full table service by wait staff, and cafeteria sit-down restaurants where customers go to serving counters/stalls to pick their food. Coffee shop category includes restaurants where coffee and/or baked food/pastries are the main items sold. Fast food restaurants are characterized by no or minimal table service and by food that is cooked at least in part in advance and is supplied quickly after ordering, and include those restaurants that are take-out only.

Supplementary Table 1. Numbers of each restaurant categories (percentages) by neighbourhood distress level<sup>†</sup>

| Restaurant Category                    | Neighbourhood Distress Level |           |           |
|----------------------------------------|------------------------------|-----------|-----------|
|                                        | Low                          | Middle    | High      |
| Standard Sit-down Restaurants          | 17(28.3)                     | 81(44.0)  | 49(49.0)  |
| High-end Sit-down Restaurants          | 0(0)                         | 19(10.3)  | 1(1.0)    |
| Cafeteria Sit-down Restaurants         | 3(5.0)                       | 4(2.2)    | 4(4.0)    |
| Chain Coffee Shops                     | 3(5.0)                       | 5(2.7)    | 6(6.0)    |
| Independent Coffee Shops               | 2(3.3)                       | 12(6.5)   | 2(2.0)    |
| Burger & Chicken Fast Food Restaurants | 10(16.7)                     | 13(7.1)   | 15(15.0)  |
| Pita & Sandwich Fast Food Restaurants  | 8(13.3)                      | 23(12.5)  | 7(7.0)    |
| Pizza Fast Food Restaurants            | 10(16.7)                     | 12(6.5)   | 10(10.0)  |
| Ethnic Fast Food Restaurants           | 7(11.7)                      | 15(8.2)   | 6(6.0)    |
| All                                    | 60(17.4)                     | 184(53.5) | 100(29.1) |

<sup>†</sup> Neighbourhoods were classified as low, middle or high socioeconomic distress level based on indicators in the Material Deprivation Index.
